# Supplementary material for: First investigation of polyoxoniobate and polyoxotantalate aqueous speciation by capillary zone electrophoresis
Source: Royal Society of Chemistry journal article supplement (doi:10.1039/c5ra11521c), 2015-01-01
Supplement: c5ra11521c1.pdf [file c5ra11521c1.pdf]

Supplementary information

## First investigation of polyoxoniobate and polyoxotantalate aqueous speciation by capillary zone electrophoresis

Cite this: DOI: 10.1039/x0xx00000x

Received 00th month 201X,  
Accepted 00th month 201X

DOI: 10.1039/x0xx00000x

[www.rsc.org/](http://www.rsc.org/)

### Affiliations :

<sup>a</sup> PSL Research University, Chimie ParisTech - CNRS, Institut de Recherche de Chimie Paris, 11 rue Pierre et Marie Curie, 75005 Paris, France. E-mail : [gauthier.debloncel@chimie-paris.org](mailto:gauthier.debloncel@chimie-paris.org)

<sup>b</sup> Eramet Research, Hydrometallurgy department, F-78193 Trappes, France

<sup>c</sup> PSL Research University, ESPCI ParisTech, Laboratory of Analytical and Bioanalytical Sciences and Miniaturization, UMR CBI 8231, 10 rue Vauquelin, 75231 Paris cedex 05, France

<sup>d</sup> CNRS, UMR CBI 8231, 75005, Paris, France

<sup>e</sup> PSL Research University, Chimie ParisTech, 75005, Paris, France

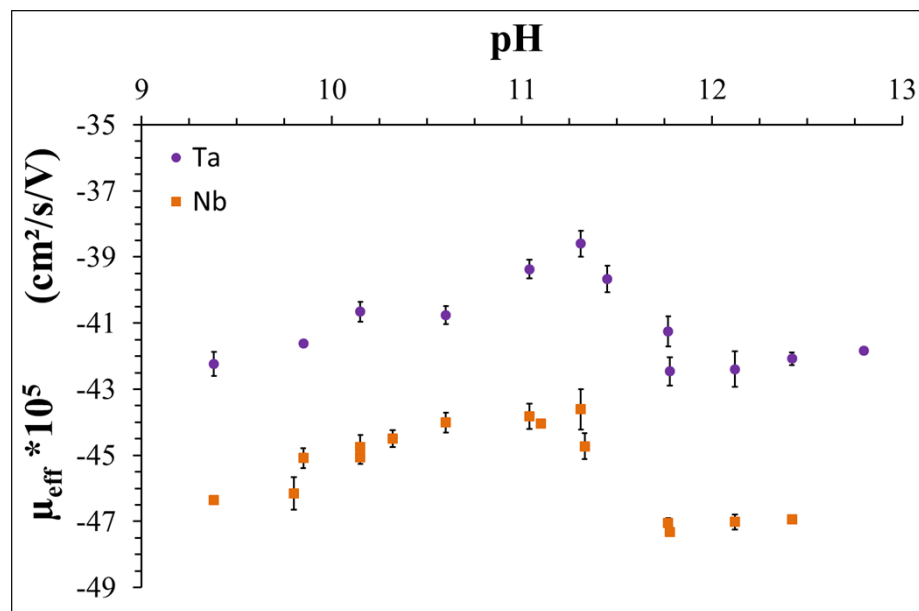

**Figure S1.** Effective mobility measured for  $H_xTa_6O_{19}^{x-8}(aq)$  (purple circles) and  $H_xNb_6O_{19}^{x-8}(aq)$  (orange squares) as a function of pH in  $Na^+$  media ( $[Na] = 50$  mM).  $I = 50$  mM.  $T = 25$  °C.  $[M_6O_{19}]_{total} = 0.25$  mM. CE conditions: see Figure 3 and Figure 4. The error bars correspond to standard deviation obtained from triplicate injection of the same sample.

## Supplementary information

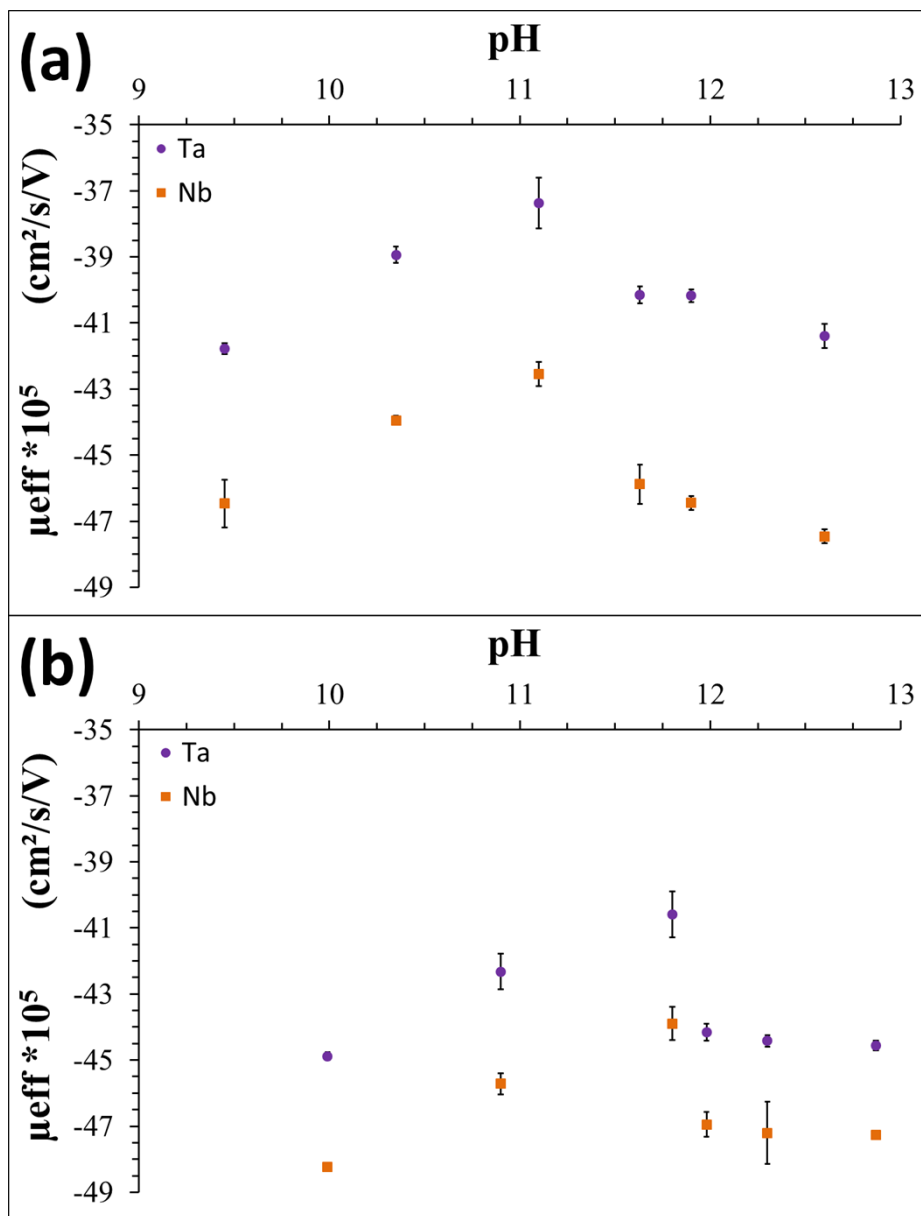

**Figure S2.** Effective mobility measured for  $\text{H}_x\text{Ta}_6\text{O}_{19}^{x-8}(\text{aq})$  (purple circles) and  $\text{H}_x\text{Nb}_6\text{O}_{19}^{x-8}(\text{aq})$  (orange squares) as a function of pH in: **(a)**  $\text{Li}^+$  media with  $[\text{Li}] = 50$  mM and **(b)**  $\text{K}^+$  media with  $[\text{K}] = 50$  mM.  $I = 50$  mM.  $T = 25$  °C.  $[\text{M}_6\text{O}_{19}]_{\text{total}} = 0.25$  mM. CE conditions: same as on Figure 4. The error bars correspond to standard deviation obtained from triplicate injection of the same sample.

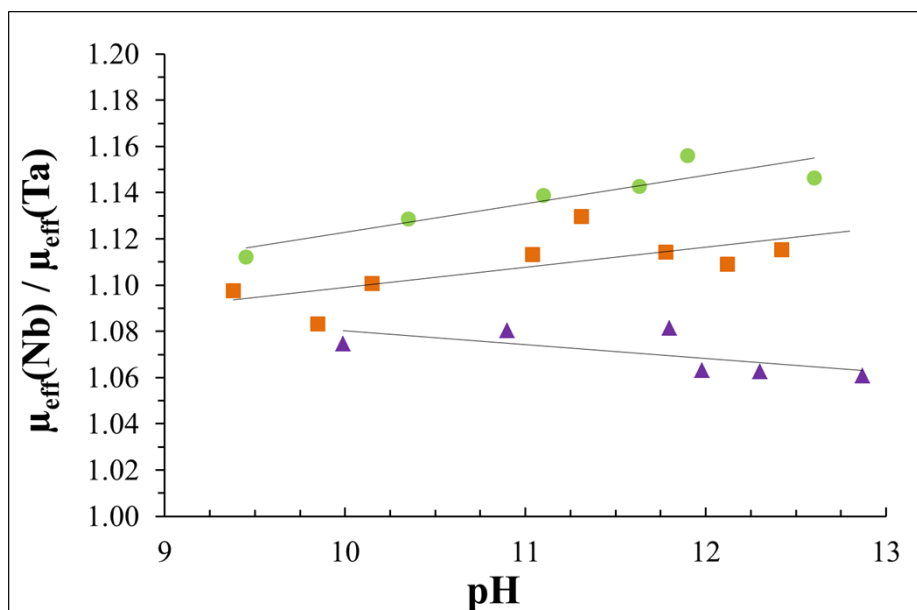

**Figure S3.** Effective mobility of  $\text{H}_x\text{Nb}_6\text{O}_{19}^{x-8}(\text{aq})$  divided by the effective mobility of  $\text{H}_x\text{Ta}_6\text{O}_{19}^{x-8}(\text{aq})$  as a function of pH. (green circles)  $\text{Li}^+$  media with  $[\text{Li}] = 50 \text{ mM}$ , (orange squares)  $\text{Na}^+$  media with  $[\text{Na}] = 50 \text{ mM}$  and (purple triangle)  $\text{K}^+$  media with  $[\text{K}] = 50 \text{ mM}$ .  $I = 50 \text{ mM}$ .  $T = 25 \text{ }^\circ\text{C}$ .  $[\text{M}_6\text{O}_{19}]_{\text{total}} = 0.25 \text{ mM}$ . CE conditions: see Figure 4.
